# Supplementary material for: Microbial Community Structure in Arctic Lake Sediments Reflect Variations in Holocene Climate Conditions
Source: Front Microbiol. 2020 Jul 24;11:1520. doi: 10.3389/fmicb.2020.01520 (PMC7396534; doi:10.3389/fmicb.2020.01520)
Supplement: Supplementary file 5 [file Data_Sheet_4.csv]

	Depth	MS	LOI	DBD
1	0.5	9.79	6.49078264709146	1.8118
2	1	12.14	6.66139553271424	1.0118
3	1.5	13.66	6.51072124756341	1.026
4	2	13.7	7.3222158328541	1.0434
5	2.5	22.48	6.65226781857473	0.926000000000002
6	3	35.01	6.49180327868855	0.914999999999999
7	3.5	27.1	6.36969192339713	0.960799999999999
8	4	14.55	6.33123689727476	0.954000000000001
9	4.5	12.5	5.42970776413651	1.1566
10	5	12.88	5.44769085768147	1.061
11	5.5	12.75	5.1015004413063	1.133
12	6	15.88	5.16692062612552	1.4438
13	6.5	17.34	5.31451733973866	1.3322
14	7	16	5.22782459648622	1.4002
15	7.5	15.96	4.8295454545455	1.4784
16	8	17.15	4.67185761957728	1.4384
17	8.5	17.61	4.65482669722151	1.3964
18	9	16.84	4.5311860242938	1.4654
19	9.5	17.39	4.8409994321409	1.4088
20	10	13.41	4.42017680707238	1.5384
21	10.5	4.74	4.6109921484653	1.401
22	11	7.24	4.75746268656712	1.2864
23	11.5	13.72	4.89521938441381	1.2216
24	12	14.77	4.77634571645177	1.319
25	12.5	15.21	4.97185741088188	1.2792
26	13	16.08	4.94207361783273	1.3638
27	13.5	17.8	4.97557997557978	1.3104
28	14	17.76	4.78691655724015	1.6754
29	14.5	17.23	4.91649023759119	1.7004
30	15	14.58	5.16452872281097	1.793
31	15.5	14.61	5.42922114837974	1.4072
32	16	8.69	5.28897746435682	1.3046
33	16.5	9.94	5.0135910601028	1.3244
34	17	8.55	4.92682219968131	1.3802
35	17.5	11.28	5.67282321899734	1.2128
36	18	12.24	4.37069066261539	1.7114
37	18.5	7.39	4.32775533756482	1.3864
38	19	12.82	4.56718878812879	1.213
39	19.5	9.8	4.84007446268389	1.1818
40	20	12.68	5.17928286852582	1.1546
41	20.5	13.39	5.51805602429971	1.1852
42	21	14.68	5.58014543155251	1.2652
43	21.5	17.16	5.32199653597876	1.2702
44	22	13.77	6.44560987988497	1.1822
45	22.5	11.77	6.13562970936482	1.3006
46	23	13.69	4.76521255904419	1.4396
47	23.5	19.74	5.09685614480784	1.2596
48	24	11.99	5.32587109586576	1.1078
49	24.5	12.19	5.02289850790352	1.3538
50	25	15.14	5.24431995020252	1.2852
51	25.5	16.92	4.95639534883702	1.376
52	26	17.42	5.19305344798504	1.1862
53	26.5	17.18	5.12987012987028	1.232
54	27	15.45	5.68296795952776	1.186
55	27.5	12.83	6.61764705882351	1.0608
56	28	9.38	7.74390243902438	0.984000000000002
57	28.5	3.43	7.09690390028135	0.994800000000001
58	29	2.43	6.873977086743	0.977600000000002
59	29.5	3.87	7.10116731517515	1.028
60	30	4.53	7.15542521994135	1.023
61	30.5	7.63	6.61618893095361	1.1094
62	31	8.08	6.26566416040079	1.0374
63	31.5	10.61	6.28057131676806	1.0222
64	32	9.16	6.40822784810142	1.0112
65	32.5	8.07	5.84289496910843	1.133
66	33	10.33	7.14682466209972	1.0802
67	33.5	11.13	6.73615132213865	1.0362
68	34	6.86	7.66813324952857	0.954600000000003
69	34.5	5.43	7.08577517314855	1.1262
70	35	4.72	7.15251944538369	1.1828
71	35.5	5.83	6.62352493338419	1.0508
72	36	9.39	7.09734124368256	0.9102
73	36.5	5.98	6.0083762886598	1.2416
74	37	5.69	7.2257581430174	1.0684
75	37.5	7.46	7.07499494643221	0.9894
76	38	8.44	7.4414882976596	0.9998
77	38.5	5.95	7.75458031529587	0.938799999999997
78	39	3.47	9.19257436815032	0.894200000000001
79	39.5	2.78	10.9735777195904	0.840199999999999
80	40	2.87	8.78813923506672	0.930800000000001
81	40.5	3.62	8.63153755407012	1.0172
82	41	3.21	7.85854616895857	1.018
83	41.5	4.58	7.57946210268956	0.9816
84	42	7	9.13160250671422	0.893599999999999
85	42.5	6.76	9.38000457561168	0.874199999999998
86	43	4.54	8.74892519346538	0.930400000000002
87	43.5	3.16	8.75836120401338	0.956800000000001
88	44	3.84	8.38884263114078	0.960799999999999
89	44.5	5.49	9.07507739938097	1.0336
90	45	5.75	9.47584405894402	1.0722
91	45.5	3.7	10.7240561736275	1.0966
92	46	5.9	10.5619244502911	1.0642
93	46.5	6.02	9.76315313686499	1.1062
94	47	9.69	10.295126973233	0.874200000000002
95	47.5	6.43	9.26953305594097	0.865200000000002
96	48	5.05	9.03518728717398	0.881
97	48.5	5.35	8.59750240153697	0.832800000000002
98	49	5.39	9.44689182574618	0.8172
99	49.5	5.93	10.4757328207596	0.8324
100	50	4.24	8.3333333333333	0.825599999999998
101	50.5	4.53	11.8535016085128	0.808199999999999
102	51	3.01	10.3659922709708	0.879799999999999
103	51.5	3.56	11.0149672591208	0.8552
104	52	5.99	11.5824231648464	0.787400000000002
105	52.5	6.85	12.7912621359222	0.824000000000002
106	53	6.27	12.2596754057427	0.800999999999998
107	53.5	8.11	9.21523248474632	0.950599999999998
108	54	8.47	10.7361963190185	0.8476
109	54.5	6.9	13.4745992936702	0.7362
110	55	5.61	12.3896409652736	0.679600000000001
111	55.5	4.92	11.443994601889	0.741
112	56	5.45	10.4156107450584	0.789199999999997
113	56.5	5.22	9.38555030384886	0.8886
114	57	6.16	9.25570484111716	0.937799999999999
115	57.5	9.51	9.01678657074326	0.834
116	58	9.54	9.42249240121583	0.921199999999999
117	58.5	8.11	8.82555734313975	0.870200000000001
118	59	8.26	9.79392865056504	0.9026
119	59.5	8.56	10.9200968523002	0.826000000000001
120	60	7.33	12.9725085910651	0.698399999999999
121	60.5	7.17	10.6000983767833	0.813200000000002
122	61	7.61	9.37571461239432	0.874600000000001
123	61.5	9.57	9.64419475655427	0.854400000000002
124	62	11.14	10.0542775911088	0.773799999999998
125	62.5	7.25	9.00387508547992	0.877399999999998
126	63	7.07	10.0519210799586	0.963000000000001
127	63.5	10.98	8.61483110133902	1.0006
128	64	10.61	11.1703308905175	0.900599999999997
129	64.5	11.58	10.1201384646711	0.982199999999999
130	65	10.46	7.82237403928264	1.171
131	65.5	13.24	8.13062760381662	1.4882
132	66	21.04	11.1682586333579	0.816600000000001
133	66.5	22.21	9.59847036328877	1.046
134	67	10.9	11.1054508405505	0.785200000000003
135	67.5	8.4	10.1851851851853	0.863999999999997
136	68	8.12	11.1425873465534	0.847200000000001
137	68.5	7.96	11.1658031088085	0.772000000000002
138	69	6.99	11.1530715005039	0.794400000000003
139	69.5	6.54	10.5263157894738	0.851199999999999
140	70	6.94	9.7954545454547	0.880000000000003
141	70.5	7.02	9.40985130111517	0.860800000000001
142	71	10.23	9.48076031525281	0.8628
143	71.5	9.69	9.38409311348173	0.8248
144	72	10.54	8.93345487693732	0.877600000000001
145	72.5	11.5	8.56658184902462	0.943199999999997
146	73	10.3	10.7206142941526	0.677199999999999
147	73.5	7.44	11.1742424242424	0.739199999999997
148	74	3.89	11.5237575095575	0.732399999999998
149	74.5	6.56	12.1035058430718	0.718799999999998
150	75	8.43	12.9823594266815	0.7256
151	75.5	6.02	14.1335914811232	0.619800000000001
152	76	6.98	14.3261074458059	0.636600000000001
153	76.5	7.33	13.2058823529412	0.68
154	77	6.85	15.1395730706073	0.608999999999998
155	77.5	5.11	13.675783855904	0.599600000000002
156	78	4.38	12.5833574949261	0.689800000000002
157	78.5	4.87	11.7495711835335	0.6996
158	79	5.43	13.5107471852611	0.586199999999998
159	79.5	4.39	15.6389941439886	0.5806
160	80	3.76	12.4160000000001	0.625
161	80.5	4.24	10.4751001717229	0.698800000000002
162	81	5.57	12.6812816188868	0.593
163	81.5	4.82	11.634844868735	0.670400000000001
164	82	5.47	7.47583243823823	0.930999999999997
165	82.5	7.28	10.6718274813378	0.723399999999998
166	83	4.39	11.9601328903655	0.662199999999999
167	83.5	2.2	11.7529310837862	0.699399999999997
168	84	3.05	12.9299754299759	0.651199999999999
169	84.5	4.47	11.9491525423727	0.707999999999998
170	85	4.5	13.9183542269367	0.622200000000003
171	85.5	4.35	11.5716753022449	0.694799999999997
172	86	4.91	11.8167202572344	0.746399999999998
173	86.5	6.6	15.2925531914892	0.601599999999998
174	87	8.77	13.6718750000001	0.665600000000001
175	87.5	5.16	12.0538023797205	0.773200000000003
176	88	6.1	10.6828455864859	0.840600000000002
177	88.5	8.28	10.0561510974989	0.7836
178	89	6.63	12.6513702995539	0.627599999999997
179	89.5	4.41	12.0474406991258	0.640799999999999
180	90	4.42	12.1704475781729	0.6524
181	90.5	4.54	11.6193181818178	0.704000000000001
182	91	5.09	10.9786388474913	0.805199999999999
183	91.5	7.42	10.4276069017255	0.799800000000001
184	92	10.77	11.2956810631222	0.7224
185	92.5	7.76	9.27929580047669	1.0906
186	93	7.07	12.493254182407	0.741199999999999
187	93.5	7.81	14.513788098694	0.689
188	94	6.74	12.4731182795699	0.744000000000003
189	94.5	6.12	12.2811469170264	0.7882
190	95	7.21	13.5874308990397	0.6874
191	95.5	5.5	13.375634517766	0.787999999999997
192	96	6.56	13.4745762711866	0.708000000000002
193	96.5	6.46	11.9660194174758	0.824000000000002
194	97	7.35	11.8193224592222	0.797000000000001
195	97.5	6.34	14.3530798703213	0.678599999999999
196	98	6.37	15.6749840051182	0.6252
197	98.5	4.69	17.1136653895273	0.6264
198	99	4.09	15.7610327229056	0.6662
199	99.5	5.42	15.5740432612317	0.600999999999999
200	100	4.92	16.3986013986011	0.571999999999999
201	100.5	4.54	16.3147138964578	0.587200000000003
202	101	4.68	15.8938279501118	0.625399999999999
203	101.5	4.22	14.1038197845246	0.6126
204	102	4.77	12.3199205166422	0.805199999999999
205	102.5	4.65	12.6674107142855	0.716799999999999
206	103	5.95	13.9300699300698	0.715
207	103.5	5.59	12.9885395239494	0.680600000000002
208	104	6.54	12.6298063429694	0.712600000000002
209	104.5	4.37	12.2327469553449	0.739000000000001
210	105	4.94	13.5913591359139	0.666599999999999
211	105.5	4.24	14.209938581798	0.7164
212	106	4.67	13.1965622400885	0.721399999999999
213	106.5	6.41	13.0356065178029	0.662800000000001
214	107	5.29	13.0293159609122	0.6754
215	107.5	5.04	14.9231678486996	0.6768
216	108	4.83	14.7286821705427	0.7224
217	108.5	5.86	12.9416684089483	0.956600000000002
218	109	11.01	6.52254022847323	1.6282
219	109.5	26.37	12.0055839925548	0.8596
220	110	21.43	8.85555783850403	0.973399999999998
221	110.5	9.84	9.89993612944433	0.939399999999999
222	111	9.77	6.92283264528443	1.2596
223	111.5	11.75	12.5272331154682	0.734400000000001
224	112	16.17	14.1567236375365	0.620200000000001
225	112.5	5.81	14.5449137418203	0.6724
226	113	4.71	14.7476579026896	0.661799999999999
227	113.5	5.08	16.2170263788969	0.667199999999998
228	114	5.44	16.7109536462946	0.677399999999999
229	114.5	5.91	17.6839703365662	0.7012
230	115	5.95	15.2798341723425	0.6754
231	115.5	6	13.0700517160319	0.850800000000003
232	116	6.56	14.4736842105263	0.684000000000001
233	116.5	5.23	14.2732558139537	0.688000000000002
234	117	4.53	14.6973224679859	0.687200000000001
235	117.5	5.52	14.8373446178262	0.7562
236	118	8.23	13.6572890025575	0.782
237	118.5	8.75	14.0791656790709	0.843800000000002
238	119	8.12	15.5311211466716	1.0186
239	119.5	10.78	13.5294117647057	0.917999999999999
240	120	17.67	11.6970278044104	0.834399999999999
241	120.5	12.34	12.0918367346938	0.783999999999999
242	121	7.65	12.2870170386368	0.833400000000001
243	121.5	14.03	14.7004486671945	0.7578
244	122	7.78	10.4700854700854	0.936
245	122.5	7.79	37.2706125613857	0.773800000000001
246	123	7.65	27.9921700223712	0.715199999999999
247	123.5	5.07	13.9216223622912	0.729800000000001
248	124	6.64	16.232339089482	0.637
249	124.5	5.01	14.6778387749207	0.6922
250	125	5.88	14.5001416029453	0.706199999999999
251	125.5	7.76	14.5535714285719	0.672000000000001
252	126	7.42	15.8136684033095	0.6526
253	126.5	5.65	14.3692307692311	0.650000000000002
254	127	3.45	14.6108179419524	0.606400000000001
255	127.5	4.22	13.6706473915775	0.636400000000002
256	128	4.49	12.7179795550208	0.665199999999999
257	128.5	3.49	12.4815579817058	0.677800000000001
258	129	4.01	14.3934821967413	0.662800000000001
259	129.5	5.6	14.9575242718448	0.659200000000002
260	130	4.69	14.6797425681889	0.6526
261	130.5	5.03	14.4353518821605	0.610999999999997
262	131	4.82	13.7353962740763	0.633400000000002
263	131.5	4.35	13.9934776163653	0.674599999999998
264	132	4.23	15.126300148588	0.672999999999998
265	132.5	5.74	13.3909931404713	0.6706
266	133	4.08	14.1339628208912	0.677800000000001
267	133.5	6.6	12.3582089552237	0.670000000000002
268	134	6.09	14.4768856447686	0.657599999999999
269	134.5	4.44	15.3794492948287	0.595600000000001
270	135	4.78	15.2173913043481	0.634800000000002
271	135.5	3.29	13.5872825434911	0.666799999999999
272	136	2.93	13.1441617742989	0.613199999999999
273	136.5	3.21	12.6878130217025	0.718799999999998
274	137	3.24	14.2624552263104	0.6142
275	137.5	3.66	14.5275035260928	0.709
276	138	4.68	13.307086614173	0.762
277	138.5	7.06	13.9938427092081	0.714600000000001
278	139	7.54	13.0675526024359	0.722399999999997
279	139.5	4.73	13.6998254799298	0.6876
280	140	6.09	13.9828080229226	0.698
281	140.5	5.23	13.7595369639566	0.760199999999998
282	141	5.29	13.0472600753841	0.689800000000002
283	141.5	5.65	11.4600550964189	0.726000000000003
284	142	5.77	10.0602688919796	0.8628
285	142.5	6.14	10.0765027322403	0.914999999999999
286	143	8.92	13.6630343671415	0.715800000000002
287	143.5	9.25	11.7086978898612	0.777200000000001
288	144	11.82	13.6430896715002	0.675799999999999
289	144.5	5.13	13.3717404487569	0.659600000000001
290	145	4.94	12.7440633245381	0.757999999999999
291	145.5	3.75	8.60424028268554	1.132
292	146	5.89	13.0331125827816	0.755000000000003
293	146.5	7.59	12.281926029309	0.8598
294	147	5.4	15.7646318439271	0.6356
295	147.5	4.74	14.6067415730336	0.712
296	148	4.73	13.7745493677697	0.743399999999998
297	148.5	4.49	13.6568848758467	0.7088
298	149	4.38	15.6735385484327	0.708200000000001
299	149.5	8.2	13.755230125523	0.764800000000001
300	150	5.07	14.8898678414099	0.681000000000001
301	150.5	5.11	14.2048670062253	0.706800000000001
302	151	6.47	13.4266886326193	0.728400000000001
303	151.5	6.08	14.7592245153221	0.639600000000002
304	152	4.69	14.451928965095	0.653199999999998
305	152.5	5.24	11.5477792732166	0.742999999999999
306	153	4.15	13.758909203595	0.645400000000002
307	153.5	3.08	13.3722546566583	0.7194
308	154	3.85	13.8141809290952	0.654399999999999
309	154.5	4.21	12.1481481481483	0.675000000000001
310	155	2.91	14.1645728643215	0.636800000000001
311	155.5	2.94	14.3459915611817	0.663599999999999
312	156	3.25	13.0487071557427	0.665199999999999
313	156.5	3.13	13.1722054380663	0.662000000000003
314	157	4.64	14.5035885167461	0.668799999999997
315	157.5	5.37	12.7882037533514	0.745999999999999
316	158	3.24	12.2271825396827	0.8064
317	158.5	3.79	13.9811148339937	0.656600000000001
318	159	5.18	11.0393946138437	0.898600000000002
319	159.5	3.75	13.3074162679424	0.668799999999997
320	160	4.67	12.544696066746	0.671199999999999
321	160.5	4.44	11.6603976356798	0.744399999999999
322	161	7.24	12.5723472668814	0.622000000000003
323	161.5	4.97	12.9460336184019	0.6782
324	162	3.92	11.8225217635495	0.712199999999999
325	162.5	3.37	10.1357904946654	0.8248
326	163	2.95	10.275482093664	0.725999999999999
327	163.5	3.77	12.4186704384726	0.707000000000001
328	164	3.83	12.8310771041793	0.679600000000001
329	164.5	2.09	10.9999999999998	0.739999999999998
330	165	2.31	11.3890523837548	0.679599999999997
331	165.5	1.62	12.3595505617977	0.640800000000002
332	166	2.52	12.2225510506065	0.675800000000002
333	166.5	2.13	11.3986444855209	0.6492
334	167	2.28	11.4647804302977	0.678599999999999
335	167.5	2.46	11.3630002798772	0.714600000000001
336	168	2.65	10.5364511691883	0.727
337	168.5	2.68	10.6332138590201	0.837
338	169	2.6	11.3339777670374	0.8276
339	169.5	2.76	12.2933333333336	0.75
340	170	3.2	12.5886091420188	0.818200000000001
341	170.5	2.99	11.8684153945387	0.930199999999999
342	171	4.39	10.3414053195715	1.0076
343	171.5	4.01	8.85709937604616	1.3142
344	172	6.11	9.77999630245876	1.0818
345	172.5	7.77	11.2051792828685	0.8032
346	173	12.57	12.655601659751	0.7712
347	173.5	13.7	12.6367614879647	0.731199999999998
348	174	4.32	12.7129337539427	0.634
349	174.5	2.31	12.4701670644392	0.670400000000001
350	175	2.19	10.6566689388773	0.880199999999999
351	175.5	2.25	11.1854428686113	0.747399999999999
352	176	2.47	11.6763969974979	0.7194
353	176.5	4.69	12.453728186145	0.756399999999999
354	177	5.61	11.2134772308503	0.759799999999998
355	177.5	2.19	11.161792326268	0.7454
356	178	1.93	12.0976692563822	0.720800000000001
357	178.5	2.24	11.9779582366588	0.689600000000002
358	179	2.43	12.0684736091301	0.701000000000001
359	179.5	2.58	13.038130381304	0.650400000000001
360	180	2.55	12.7659574468082	0.639199999999999
361	180.5	3	12.2850804215196	0.7212
362	181	2.35	10.9195402298851	0.696000000000002
363	181.5	2.36	9.75495915986005	0.856999999999999
364	182	2.58	8.75420875420855	0.950399999999998
365	182.5	2.94	10.1759133964816	0.738999999999997
366	183	3.72	11.9273515857953	0.7378
367	183.5	7.37	11.3849450843822	0.746599999999997
368	184	5.57	11.6197183098592	0.6816
369	184.5	1.67	11.3139624582152	0.777799999999999
370	185	1.48	11.5503223997757	0.7134
371	185.5	2.3	11.4571092831966	0.680800000000001
372	186	2.14	12.7320185614851	0.689599999999999
373	186.5	2.89	12.6474056603772	0.6784
374	187	2.98	12.9546904913847	0.626799999999999
375	187.5	2.45	12.3120567375886	0.705000000000002
376	188	2.36	10.5761843790012	0.780999999999999
377	188.5	1.83	10.4489795918366	0.734999999999999
378	189	2.05	10.864864864865	0.739999999999998
379	189.5	2.48	12.7091282653357	0.6814
380	190	2.43	12.7450980392156	0.673199999999998
381	190.5	1.09	11.5147963668325	0.682599999999997
382	191	0.5	10.6696304529034	0.719799999999999
383	191.5	0.26	10.5356689515104	0.787799999999997
384	192	0.41	11.4632857897517	0.757200000000001
385	192.5	0.24	11.9350073855244	0.677
386	193	0.2	10.9739368998628	0.8748
387	193.5	0.17	10.8184869610122	0.7746
388	194	0.18	10.0023702299122	0.843799999999998
389	194.5	0.21	10.728507847271	0.8538
390	195	0.21	11.1650485436895	0.947600000000001
391	195.5	0.22	10.2824040550327	0.828599999999998
392	196	0.23	10.2010892333473	0.954800000000002
393	196.5	0.33	9.51834862385344	0.872
394	197	0.58	9.51577933028192	0.830200000000001
395	197.5	0.31	10.9371402256504	0.868599999999997
396	198	0.25	9.70660146699261	0.818000000000001
397	198.5	0.21	8.95417156286723	0.850999999999999
398	199	0.21	9.31174089068814	0.889199999999999
399	199.5	0.2	9.1015169194869	0.857000000000003
400	200	0.23	8.51159648727779	0.888200000000001
401	200.5	0.22	9.92978936810434	0.997
402	201	0.23	9.39691444600292	0.855599999999999
403	201.5	0.25	9.14560770156402	0.831
404	202	0.3	9.63528831936942	0.811600000000002
405	202.5	0.2	9.70277573077833	0.8142
406	203	0.33	9.8216593434997	0.773799999999998
407	203.5	0.18	8.58546677010624	0.773399999999999
408	204	0.17	8.55323020928103	0.879200000000001
409	204.5	0.15	8.94134477825457	0.838799999999999
410	205	0.25	10.3865307090351	0.843400000000003
411	205.5	0.26	9.59619952494063	0.841999999999999
412	206	0.26	8.56734888148492	0.840399999999999
413	206.5	0.21	8.32526621490798	0.8264
414	207	0.3	9.31142410015657	0.7668
415	207.5	0.28	10.1769911504423	0.7684
416	208	0.28	10.1320467242254	0.787599999999998
417	208.5	0.18	10.5069970176646	0.8718
418	209	0.18	10.0368324125229	0.8688
419	209.5	0.12	9.90812018872596	0.805399999999999
420	210	0.21	9.26285160038792	0.8248
421	210.5	0.2	9.46396511926119	0.779799999999998
422	211	0.17	9.88413336486173	0.845800000000001
423	211.5	0.2	9.80106744298887	0.824399999999997
424	212	0.18	10.3738317757012	0.856000000000002
425	212.5	0.17	10.3412346965356	0.767799999999998
426	213	0.22	10.2918586789556	0.781199999999998
427	213.5	0.17	10.4807936911727	0.786199999999997
428	214	0.17	10.3565750624575	0.880600000000001
429	214.5	0.17	8.9964719717757	1.0204
430	215	0.2	9.79260209536022	0.935400000000001
431	215.5	0.21	11.243832770709	0.770199999999999
432	216	0.32	10.0809248554912	0.865000000000002
433	216.5	0.26	9.22306959008587	0.839200000000002
434	217	0.15	9.53645581844486	0.828399999999998
435	217.5	0.16	7.82426778242676	0.956
436	218	0.22	6.44761314321153	1.2904
437	218.5	0.58	5.84770114942545	1.392
438	219	0.72	10.2575390710983	0.9086
439	219.5	1.25	9.0620752152241	0.8828
440	220	0.43	9.26796507723328	0.893400000000003
441	220.5	0.23	9.65803108808285	0.965
442	221	0.24	9.78549047963355	0.829799999999999
443	221.5	0.2	9.73630831642976	0.8874
444	222	0.24	9.42242833052292	0.948799999999999
445	222.5	0.16	9.53410182516804	0.832800000000002
446	223	0.18	9.20056764427665	0.845600000000001
447	223.5	0.23	9.96724379971927	0.854800000000001
448	224	0.26	9.56483322288499	0.9054
449	224.5	0.17	5.67226890756299	1.428
450	225	0.22	7.24784591991882	1.1838
451	225.5	0.27	7.87198822880261	1.0874
452	226	0.6	7.07579972183606	1.1504
453	226.5	0.36	9.68828980623445	0.9496
454	227	0.56	9.03512484130341	0.9452
455	227.5	0.48	7.31946624803768	1.0192
456	228	0.37	7.15260183200151	1.0262
457	228.5	0.46	5.24109014675035	1.2402
458	229	0.43	5.40981176819329	1.3494
459	229.5	0.74	6.36425186188221	0.886199999999999
460	230	0.91	5.59288178681666	1.1014
461	230.5	0.54	5.0965250965251	1.554
462	231	0.63	5.00243625142103	1.2314
463	231.5	1.75	NA	NA
464	232	0.98	5.57788944723626	1.194
465	232.5	0.9	5.58529621698816	1.1208
466	233	0.8	4.45603576751111	1.342
467	233.5	1.11	4.00558269364977	1.433
468	234	2.42	2.7788115618411	1.6122
469	234.5	7.09	1.89233560874438	2.3146
470	235	13.32	1.79579271421241	2.7286
471	235.5	19.91	1.65537419156141	2.5976
472	236	44.59	1.4135200575878	3.0562
473	236.5	94.13	1.76794789206208	2.7942
474	237	58.31	1.65406732570916	3.0954
475	237.5	42.4	1.5986973577085	2.7022
476	238	32.66	1.35340632603403	2.6304
477	238.5	27.53	1.25577461123048	3.0738
478	239	29.89	1.23933804767815	2.7434
479	239.5	34.54	1.05242642759704	3.0786
480	240	40.71	0.891636450098119	3.3646
481	240.5	51.09	0.945642110831812	3.0244
482	241	57.96	0.850811238622896	3.0324
483	241.5	67.87	0.915558304979839	3.233
484	242	70.24	0.874067101459019	2.9746
485	242.5	65.14	1.08794788273617	3.07
486	243	73.67	0.937581956464754	3.0504
487	243.5	75.51	1.14256696711951	3.1508
488	244	79.21	0.994648673801819	3.4384
